# Supplementary material for: Aqueous system-level processes and prokaryote assemblages in the ferruginous and sulfate-rich bottom waters of a post-mining lake
Source: Copernicus journal article supplement (doi:10.5194/bg-19-1723-2022), 2022-03-24
Supplement: Supplementary file 1 [file bg-19-1723-2022-supplement.zip]

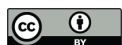

## *Supplement of*

# **Aqueous system-level processes and prokaryote assemblages in the ferruginous and sulfate-rich bottom waters of a post-mining lake**

**Daniel A. Petrash et al.**

*Correspondence to:* Daniel A. Petrash (daniel.petrash@geology.cz)

- bg-19-1723-2022-supplement-title-page.pdf
- Supplement\_BG
  - Files
    - \* Input Phreeqc modelling.pdf
    - \* Iron\_modif.html
    - \* Medard\_Krona0122.html
    - \* Monimolimnic waters.phrq
    - \* Output Phreeqc modelling.pdf
    - \* Sulfate\_modif.html
    - \* iron\_files
    - \* sulfate\_files
  - Supplement\_BG.htm
  - Supplement\_BG\_files
    - \* image003.png

The copyright of individual parts of the supplement might differ from the article licence.
