# Supplementary material for: Aqueous system-level processes and prokaryote assemblages in the ferruginous and sulfate-rich bottom waters of a post-mining lake
Source: Copernicus journal article supplement (doi:10.5194/bg-19-1723-2022), 2022-03-24
Supplement: Supplementary file 2 [file bg-19-1723-2022-supplement.zip]

Input file: C:\phreeqc\exmpls\Medard.pqi  
Output file: C:\phreeqc\exmpls\Medard.pgo  
Database file: c:\phreeqc\database\wateq4f.dat

-----  
Reading data base.  
-----

SOLUTION\_MASTER\_SPECIES  
SOLUTION\_SPECIES  
PHASES  
EXCHANGE\_MASTER\_SPECIES  
EXCHANGE\_SPECIES  
SURFACE\_MASTER\_SPECIES  
SURFACE\_SPECIES  
RATES  
END

-----  
Reading input data for simulation 1.  
-----

DATABASE c:\phreeqc\database\wateq4f.dat  
SOLUTION\_MASTER\_SPECIES  
N(-3) NH4+ 0.0 N  
SOLUTION\_SPECIES  
NH4+ = NH3 + H+  
log\_k -9.252  
delta\_h 12.48 kcal  
analytical\_expression 0.6322 -0.001225 -2835.76  
NO3- + 10 H+ + 8 e- = NH4+ + 3 H2O  
log\_k 119.077  
delta\_h -187.055 kcal  
gamma 2.5000 0.0000  
SOLUTION 1 LAKE MEDARD MONIMOLIMNION'S WATER (quite imbalanced)  
units ppm # unless otherwise stated  
pH 7.6  
density 1.002  
temp 8.0  
pe -3  
Ca 6.09  
Mg 15.01  
Na 163591 ppb  
K 8004 ppb  
Al 0.0027  
Mn 1.78 pe  
Si 5274 ppb  
Cl 192073 ppb  
S(6) 1575.4  
S(-2) 4.263 ppb # L.Q. AVS  
N(5) 1.116 ppm as NO3  
N(-3) 2.345 ppm as NH4  
Fe 1.83 pe  
C(4) 397  
END

-----  
Beginning of initial solution calculations.  
-----

Initial solution 1. LAKE MEDARD MONIMOLIMNION'S WATER (quite imbalanced)

-----Solution composition-----

| Elements | Molality  | Moles     |
|----------|-----------|-----------|
| Al       | 1.003e-07 | 1.003e-07 |
| C(4)     | 6.522e-03 | 6.522e-03 |
| Ca       | 1.523e-04 | 1.523e-04 |
| Cl       | 5.431e-03 | 5.431e-03 |

|       |           |           |
|-------|-----------|-----------|
| Fe    | 3.285e-05 | 3.285e-05 |
| K     | 2.052e-04 | 2.052e-04 |
| Mg    | 6.189e-04 | 6.189e-04 |
| Mn    | 3.248e-05 | 3.248e-05 |
| N(-3) | 1.303e-04 | 1.303e-04 |
| N(5)  | 1.804e-05 | 1.804e-05 |
| Na    | 7.133e-03 | 7.133e-03 |
| S(-2) | 1.333e-07 | 1.333e-07 |
| S(6)  | 1.644e-02 | 1.644e-02 |
| Si    | 8.799e-05 | 8.799e-05 |

-----Description of solution-----

|                                          |   |              |
|------------------------------------------|---|--------------|
| pH                                       | = | 7.600        |
| pe                                       | = | -3.000       |
| Activity of water                        | = | 0.999        |
| Ionic strength (mol/kgw)                 | = | 4.230e-02    |
| Mass of water (kg)                       | = | 1.000e+00    |
| Total alkalinity (eq/kg)                 | = | 6.155e-03    |
| Total CO2 (mol/kg)                       | = | 6.522e-03    |
| Temperature (°C)                         | = | 8.00         |
| Electrical balance (eq)                  | = | -3.534e-02   |
| Percent error, 100*(Cat- An )/(Cat+ An ) | = | -68.23       |
| Iterations                               | = | 8            |
| Total H                                  | = | 1.110194e+02 |
| Total O                                  | = | 5.559156e+01 |

-----Redox couples-----

| Redox couple | pe      | Eh (volts) |
|--------------|---------|------------|
| N(-3)/N(5)   | 6.3193  | 0.3525     |
| S(-2)/S(6)   | -3.3819 | -0.1887    |

-----Distribution of species-----

| Species   | Molality  | Activity  | Log Molality | Log Activity | Log Gamma | mole V cm <sup>3</sup> /mol |
|-----------|-----------|-----------|--------------|--------------|-----------|-----------------------------|
| OH-       | 1.176e-07 | 9.724e-08 | -6.929       | -7.012       | -0.083    | (0)                         |
| H+        | 2.909e-08 | 2.512e-08 | -7.536       | -7.600       | -0.064    | 0.00                        |
| H2O       | 5.551e+01 | 9.994e-01 | 1.744        | -0.000       | 0.000     | 18.02                       |
| Al        | 1.003e-07 |           |              |              |           |                             |
| Al(OH)4-  | 9.799e-08 | 8.180e-08 | -7.009       | -7.087       | -0.078    | (0)                         |
| Al(OH)3   | 1.246e-09 | 1.258e-09 | -8.905       | -8.900       | 0.004     | (0)                         |
| Al(OH)2+  | 1.041e-09 | 8.762e-10 | -8.982       | -9.057       | -0.075    | (0)                         |
| AlOH+2    | 2.906e-11 | 1.457e-11 | -10.537      | -10.837      | -0.300    | (0)                         |
| AlSO4+    | 2.725e-12 | 2.274e-12 | -11.565      | -11.643      | -0.078    | (0)                         |
| Al(SO4)2- | 6.198e-13 | 5.174e-13 | -12.208      | -12.286      | -0.078    | (0)                         |
| Al+3      | 4.347e-13 | 1.162e-13 | -12.362      | -12.935      | -0.573    | (0)                         |
| AlHSO4+2  | 9.346e-21 | 4.541e-21 | -20.029      | -20.343      | -0.313    | (0)                         |
| C(4)      | 6.522e-03 |           |              |              |           |                             |
| HCO3-     | 6.073e-03 | 5.110e-03 | -2.217       | -2.292       | -0.075    | (0)                         |
| CO2       | 3.872e-04 | 3.910e-04 | -3.412       | -3.408       | 0.004     | (0)                         |
| NaHCO3    | 1.638e-05 | 1.654e-05 | -4.786       | -4.781       | 0.004     | (0)                         |
| MgHCO3+   | 1.348e-05 | 1.120e-05 | -4.870       | -4.951       | -0.081    | (0)                         |
| CO3-2     | 1.244e-05 | 6.235e-06 | -4.905       | -5.205       | -0.300    | (0)                         |
| FeHCO3+   | 5.408e-06 | 4.515e-06 | -5.267       | -5.345       | -0.078    | (0)                         |
| MnHCO3+   | 4.423e-06 | 3.709e-06 | -5.354       | -5.431       | -0.076    | (0)                         |
| MnCO3     | 3.994e-06 | 4.033e-06 | -5.399       | -5.394       | 0.004     | (0)                         |
| CaHCO3+   | 2.402e-06 | 2.031e-06 | -5.619       | -5.692       | -0.073    | (0)                         |
| FeCO3     | 1.309e-06 | 1.321e-06 | -5.883       | -5.879       | 0.004     | (0)                         |
| MgCO3     | 8.875e-07 | 8.962e-07 | -6.052       | -6.048       | 0.004     | (0)                         |
| CaCO3     | 3.778e-07 | 3.815e-07 | -6.423       | -6.418       | 0.004     | (0)                         |
| NaCO3-    | 3.199e-07 | 2.692e-07 | -6.495       | -6.570       | -0.075    | (0)                         |
| Ca        | 1.523e-04 |           |              |              |           |                             |
| Ca+2      | 9.028e-05 | 4.536e-05 | -4.044       | -4.343       | -0.299    | (0)                         |
| CaSO4     | 5.925e-05 | 5.983e-05 | -4.227       | -4.223       | 0.004     | (0)                         |

|        |              |           |           |         |         |        |     |
|--------|--------------|-----------|-----------|---------|---------|--------|-----|
|        | CaHCO3+      | 2.402e-06 | 2.031e-06 | -5.619  | -5.692  | -0.073 | (0) |
|        | CaCO3        | 3.778e-07 | 3.815e-07 | -6.423  | -6.418  | 0.004  | (0) |
|        | CaOH+        | 3.542e-10 | 2.995e-10 | -9.451  | -9.524  | -0.073 | (0) |
|        | CaHSO4+      | 8.854e-12 | 7.392e-12 | -11.053 | -11.131 | -0.078 | (0) |
| Cl     | 5.431e-03    |           |           |         |         |        |     |
|        | Cl-          | 5.430e-03 | 4.495e-03 | -2.265  | -2.347  | -0.082 | (0) |
|        | MnCl+        | 1.779e-07 | 1.491e-07 | -6.750  | -6.826  | -0.076 | (0) |
|        | FeCl+        | 6.538e-08 | 5.482e-08 | -7.185  | -7.261  | -0.076 | (0) |
|        | MnCl2        | 2.898e-10 | 2.927e-10 | -9.538  | -9.534  | 0.004  | (0) |
|        | MnCl3-       | 4.321e-13 | 3.624e-13 | -12.364 | -12.441 | -0.076 | (0) |
|        | FeCl+2       | 4.871e-23 | 2.409e-23 | -22.312 | -22.618 | -0.306 | (0) |
|        | FeCl2+       | 1.026e-24 | 8.565e-25 | -23.989 | -24.067 | -0.078 | (0) |
|        | FeCl3        | 3.813e-28 | 3.850e-28 | -27.419 | -27.415 | 0.004  | (0) |
| Fe (2) | 3.285e-05    |           |           |         |         |        |     |
|        | Fe+2         | 1.728e-05 | 8.835e-06 | -4.763  | -5.054  | -0.291 | (0) |
|        | FeSO4        | 8.753e-06 | 8.838e-06 | -5.058  | -5.054  | 0.004  | (0) |
|        | FeHCO3+      | 5.408e-06 | 4.515e-06 | -5.267  | -5.345  | -0.078 | (0) |
|        | FeCO3        | 1.309e-06 | 1.321e-06 | -5.883  | -5.879  | 0.004  | (0) |
|        | FeCl+        | 6.538e-08 | 5.482e-08 | -7.185  | -7.261  | -0.076 | (0) |
|        | FeOH+        | 3.446e-08 | 2.890e-08 | -7.463  | -7.539  | -0.076 | (0) |
|        | Fe (HS) 2    | 4.761e-11 | 4.808e-11 | -10.322 | -10.318 | 0.004  | (0) |
|        | Fe (OH) 2    | 2.020e-12 | 2.040e-12 | -11.695 | -11.690 | 0.004  | (0) |
|        | FeHSO4+      | 1.725e-12 | 1.440e-12 | -11.763 | -11.842 | -0.078 | (0) |
|        | Fe (OH) 3-   | 3.013e-15 | 2.526e-15 | -14.521 | -14.598 | -0.076 | (0) |
|        | Fe (HS) 3-   | 4.900e-16 | 4.091e-16 | -15.310 | -15.388 | -0.078 | (0) |
| Fe (3) | 6.593e-13    |           |           |         |         |        |     |
|        | Fe (OH) 3    | 4.295e-13 | 4.337e-13 | -12.367 | -12.363 | 0.004  | (0) |
|        | Fe (OH) 2+   | 2.207e-13 | 1.857e-13 | -12.656 | -12.731 | -0.075 | (0) |
|        | Fe (OH) 4-   | 9.063e-15 | 7.626e-15 | -14.043 | -14.118 | -0.075 | (0) |
|        | FeOH+2       | 5.647e-17 | 2.792e-17 | -16.248 | -16.554 | -0.306 | (0) |
|        | FeSO4+       | 2.156e-20 | 1.808e-20 | -19.666 | -19.743 | -0.076 | (0) |
|        | Fe (SO4) 2-  | 3.454e-21 | 2.884e-21 | -20.462 | -20.540 | -0.078 | (0) |
|        | Fe+3         | 1.176e-21 | 3.142e-22 | -20.930 | -21.503 | -0.573 | (0) |
|        | FeCl+2       | 4.871e-23 | 2.409e-23 | -22.312 | -22.618 | -0.306 | (0) |
|        | FeCl2+       | 1.026e-24 | 8.565e-25 | -23.989 | -24.067 | -0.078 | (0) |
|        | FeHSO4+2     | 2.647e-27 | 1.286e-27 | -26.577 | -26.891 | -0.313 | (0) |
|        | FeCl3        | 3.813e-28 | 3.850e-28 | -27.419 | -27.415 | 0.004  | (0) |
|        | Fe2 (OH) 2+4 | 7.934e-31 | 4.421e-32 | -30.100 | -31.354 | -1.254 | (0) |
|        | Fe3 (OH) 4+5 | 8.243e-40 | 0.000e+00 | -39.084 | -41.043 | -1.959 | (0) |
| H (0)  | 1.059e-12    |           |           |         |         |        |     |
|        | H2           | 5.293e-13 | 5.345e-13 | -12.276 | -12.272 | 0.004  | (0) |
| K      | 2.052e-04    |           |           |         |         |        |     |
|        | K+           | 1.974e-04 | 1.634e-04 | -3.705  | -3.787  | -0.082 | (0) |
|        | KSO4-        | 7.792e-06 | 6.557e-06 | -5.108  | -5.183  | -0.075 | (0) |
| Mg     | 6.189e-04    |           |           |         |         |        |     |
|        | Mg+2         | 3.813e-04 | 1.956e-04 | -3.419  | -3.709  | -0.290 | (0) |
|        | MgSO4        | 2.232e-04 | 2.254e-04 | -3.651  | -3.647  | 0.004  | (0) |
|        | MgHCO3+      | 1.348e-05 | 1.120e-05 | -4.870  | -4.951  | -0.081 | (0) |
|        | MgCO3        | 8.875e-07 | 8.962e-07 | -6.052  | -6.048  | 0.004  | (0) |
|        | MgOH+        | 6.534e-09 | 5.547e-09 | -8.185  | -8.256  | -0.071 | (0) |
| Mn (2) | 3.248e-05    |           |           |         |         |        |     |
|        | Mn+2         | 1.593e-05 | 8.144e-06 | -4.798  | -5.089  | -0.291 | (0) |
|        | MnSO4        | 7.954e-06 | 8.032e-06 | -5.099  | -5.095  | 0.004  | (0) |
|        | MnHCO3+      | 4.423e-06 | 3.709e-06 | -5.354  | -5.431  | -0.076 | (0) |
|        | MnCO3        | 3.994e-06 | 4.033e-06 | -5.399  | -5.394  | 0.004  | (0) |
|        | MnCl+        | 1.779e-07 | 1.491e-07 | -6.750  | -6.826  | -0.076 | (0) |
|        | MnOH+        | 2.285e-09 | 1.916e-09 | -8.641  | -8.718  | -0.076 | (0) |
|        | MnCl2        | 2.898e-10 | 2.927e-10 | -9.538  | -9.534  | 0.004  | (0) |
|        | MnCl3-       | 4.321e-13 | 3.624e-13 | -12.364 | -12.441 | -0.076 | (0) |
|        | Mn (NO3) 2   | 7.357e-15 | 7.429e-15 | -14.133 | -14.129 | 0.004  | (0) |
|        | Mn (OH) 3-   | 9.694e-18 | 8.129e-18 | -17.013 | -17.090 | -0.076 | (0) |
| Mn (3) | 6.769e-35    |           |           |         |         |        |     |
|        | Mn+3         | 6.769e-35 | 1.809e-35 | -34.170 | -34.743 | -0.573 | (0) |
| Mn (6) | 0.000e+00    |           |           |         |         |        |     |
|        | MnO4-2       | 0.000e+00 | 0.000e+00 | -81.073 | -81.379 | -0.306 | (0) |
| Mn (7) | 0.000e+00    |           |           |         |         |        |     |
|        | MnO4-        | 0.000e+00 | 0.000e+00 | -94.857 | -94.942 | -0.085 | (0) |
| N (-3) | 1.303e-04    |           |           |         |         |        |     |

|             |           |           |         |         |        |     |
|-------------|-----------|-----------|---------|---------|--------|-----|
| NH4+        | 1.181e-04 | 9.656e-05 | -3.928  | -4.015  | -0.087 | (0) |
| NH4SO4-     | 1.160e-05 | 9.730e-06 | -4.935  | -5.012  | -0.076 | (0) |
| NH3         | 6.054e-07 | 6.114e-07 | -6.218  | -6.214  | 0.004  | (0) |
| N (5)       | 1.804e-05 |           |         |         |        |     |
| NO3-        | 1.804e-05 | 1.483e-05 | -4.744  | -4.829  | -0.085 | (0) |
| Mn (NO3) 2  | 7.357e-15 | 7.429e-15 | -14.133 | -14.129 | 0.004  | (0) |
| Na          | 7.133e-03 |           |         |         |        |     |
| Na+         | 6.877e-03 | 5.755e-03 | -2.163  | -2.240  | -0.077 | (0) |
| NaSO4-      | 2.392e-04 | 2.013e-04 | -3.621  | -3.696  | -0.075 | (0) |
| NaHCO3      | 1.638e-05 | 1.654e-05 | -4.786  | -4.781  | 0.004  | (0) |
| NaCO3-      | 3.199e-07 | 2.692e-07 | -6.495  | -6.570  | -0.075 | (0) |
| O (0)       | 0.000e+00 |           |         |         |        |     |
| O2          | 0.000e+00 | 0.000e+00 | -73.659 | -73.655 | 0.004  | (0) |
| S (-2)      | 1.333e-07 |           |         |         |        |     |
| HS-         | 9.453e-08 | 7.814e-08 | -7.024  | -7.107  | -0.083 | (0) |
| H2S         | 3.088e-08 | 3.118e-08 | -7.510  | -7.506  | 0.004  | (0) |
| S6-2        | 6.646e-10 | 4.091e-10 | -9.177  | -9.388  | -0.211 | (0) |
| S5-2        | 5.152e-10 | 3.060e-10 | -9.288  | -9.514  | -0.226 | (0) |
| S4-2        | 3.009e-10 | 1.714e-10 | -9.522  | -9.766  | -0.245 | (0) |
| Fe (HS) 2   | 4.761e-11 | 4.808e-11 | -10.322 | -10.318 | 0.004  | (0) |
| S-2         | 2.210e-13 | 1.093e-13 | -12.656 | -12.961 | -0.306 | (0) |
| S3-2        | 1.037e-13 | 5.622e-14 | -12.984 | -13.250 | -0.266 | (0) |
| S2-2        | 5.547e-15 | 2.881e-15 | -14.256 | -14.540 | -0.284 | (0) |
| Fe (HS) 3-  | 4.900e-16 | 4.091e-16 | -15.310 | -15.388 | -0.078 | (0) |
| S (6)       | 1.644e-02 |           |         |         |        |     |
| SO4-2       | 1.588e-02 | 7.822e-03 | -1.799  | -2.107  | -0.308 | (0) |
| NaSO4-      | 2.392e-04 | 2.013e-04 | -3.621  | -3.696  | -0.075 | (0) |
| MgSO4       | 2.232e-04 | 2.254e-04 | -3.651  | -3.647  | 0.004  | (0) |
| CaSO4       | 5.925e-05 | 5.983e-05 | -4.227  | -4.223  | 0.004  | (0) |
| NH4SO4-     | 1.160e-05 | 9.730e-06 | -4.935  | -5.012  | -0.076 | (0) |
| FeSO4       | 8.753e-06 | 8.838e-06 | -5.058  | -5.054  | 0.004  | (0) |
| MnSO4       | 7.954e-06 | 8.032e-06 | -5.099  | -5.095  | 0.004  | (0) |
| KSO4-       | 7.792e-06 | 6.557e-06 | -5.108  | -5.183  | -0.075 | (0) |
| HSO4-       | 1.624e-08 | 1.355e-08 | -7.789  | -7.868  | -0.078 | (0) |
| CaHSO4+     | 8.854e-12 | 7.392e-12 | -11.053 | -11.131 | -0.078 | (0) |
| AlSO4+      | 2.725e-12 | 2.274e-12 | -11.565 | -11.643 | -0.078 | (0) |
| FeHSO4+     | 1.725e-12 | 1.440e-12 | -11.763 | -11.842 | -0.078 | (0) |
| Al (SO4) 2- | 6.198e-13 | 5.174e-13 | -12.208 | -12.286 | -0.078 | (0) |
| FeSO4+      | 2.156e-20 | 1.808e-20 | -19.666 | -19.743 | -0.076 | (0) |
| AlHSO4+2    | 9.346e-21 | 4.541e-21 | -20.029 | -20.343 | -0.313 | (0) |
| Fe (SO4) 2- | 3.454e-21 | 2.884e-21 | -20.462 | -20.540 | -0.078 | (0) |
| FeHSO4+2    | 2.647e-27 | 1.286e-27 | -26.577 | -26.891 | -0.313 | (0) |
| Si          | 8.799e-05 |           |         |         |        |     |
| H4SiO4      | 8.766e-05 | 8.852e-05 | -4.057  | -4.053  | 0.004  | (0) |
| H3SiO4-     | 3.223e-07 | 2.678e-07 | -6.492  | -6.572  | -0.081 | (0) |
| H2SiO4-2    | 4.246e-13 | 2.129e-13 | -12.372 | -12.672 | -0.300 | (0) |

-----Saturation indices-----

| Phase        | SI**   | log IAP | log K(281 K, | 1 atm)                                |
|--------------|--------|---------|--------------|---------------------------------------|
| Adularia     | -1.09  | -23.03  | -21.94       | KAlSi3O8                              |
| Al (OH) 3(a) | -2.11  | 9.86    | 11.97        | Al (OH) 3                             |
| Albite       | -2.33  | -21.48  | -19.15       | NaAlSi3O8                             |
| AlumK        | -15.45 | -20.94  | -5.49        | KAl (SO4) 2:12H2O                     |
| Alunite      | -2.03  | -1.21   | 0.83         | KAl3 (SO4) 2 (OH) 6                   |
| Analcime     | -3.92  | -17.43  | -13.51       | NaAlSi2O6:H2O                         |
| Anhydrite    | -2.11  | -6.45   | -4.34        | CaSO4                                 |
| Annite       | 8.15   | -80.26  | -88.41       | KFe3AlSi3O10 (OH) 2                   |
| Anorthite    | -6.39  | -26.62  | -20.23       | CaAl2Si2O8                            |
| Aragonite    | -1.30  | -9.55   | -8.25        | CaCO3                                 |
| Artinite     | -8.30  | 2.58    | 10.87        | MgCO3:Mg (OH) 2:3H2O                  |
| Basaluminite | -0.55  | 22.15   | 22.70        | Al4 (OH) 10SO4                        |
| Beidellite   | 0.50   | -47.45  | -47.95       | (NaKMg0.5) 0.11Al2.33Si3.67O10 (OH) 2 |
| Birnessite   | -24.29 | 19.31   | 43.60        | MnO2                                  |
| Bixbyite     | -23.95 | -23.89  | 0.06         | Mn2O3                                 |
| Boehmite     | 0.03   | 9.86    | 9.83         | AlOOH                                 |
| Brucite      | -6.55  | 11.49   | 18.04        | Mg (OH) 2                             |

|                              |        |        |        |                                            |
|------------------------------|--------|--------|--------|--------------------------------------------|
| Calcite                      | -1.14  | -9.55  | -8.40  | CaCO3                                      |
| Chalcedony                   | -0.29  | -4.05  | -3.76  | SiO2                                       |
| Chloritel4A                  | -10.07 | 65.03  | 75.09  | Mg5Al2Si3O10(OH)8                          |
| Chlorite7A                   | -13.61 | 65.03  | 78.63  | Mg5Al2Si3O10(OH)8                          |
| Chrysotile                   | -8.06  | 26.37  | 34.43  | Mg3Si2O5(OH)4                              |
| Clinoenstatite               | -4.79  | 7.44   | 12.23  | MgSiO3                                     |
| CO2(g)                       | -2.17  | -3.41  | -1.24  | CO2                                        |
| Cristobalite                 | -0.22  | -4.05  | -3.83  | SiO2                                       |
| Diaspore                     | 1.89   | 9.86   | 7.97   | AlOOH                                      |
| Diopside                     | -7.09  | 14.24  | 21.33  | CaMgSi2O6                                  |
| Dolomite                     | -1.79  | -18.46 | -16.67 | CaMg(CO3)2                                 |
| Dolomite(d)                  | -2.41  | -18.46 | -16.05 | CaMg(CO3)2                                 |
| Epsomite                     | -3.55  | -5.82  | -2.26  | MgSO4·7H2O                                 |
| Fe(OH)2.7Cl.3                | 1.35   | -1.69  | -3.04  | Fe(OH)2.7Cl0.3                             |
| Fe(OH)3(a)                   | -3.59  | 1.30   | 4.89   | Fe(OH)3                                    |
| Fe3(OH)8                     | -7.48  | 12.74  | 20.22  | Fe3(OH)8                                   |
| FeS(ppt)                     | -0.65  | -4.56  | -3.92  | FeS                                        |
| Forsterite                   | -11.53 | 18.93  | 30.46  | Mg2SiO4                                    |
| Gibbsite                     | 0.74   | 9.86   | 9.12   | Al(OH)3                                    |
| Goethite                     | 1.65   | 1.30   | -0.36  | FeOOH                                      |
| Greenalite                   | 1.52   | 22.33  | 20.81  | Fe3Si2O5(OH)4                              |
| Greigite                     | -1.05  | -46.09 | -45.03 | Fe3S4                                      |
| Gypsum                       | -1.86  | -6.45  | -4.60  | CaSO4·2H2O                                 |
| H2(g)                        | -9.20  | -12.27 | -3.07  | H2                                         |
| H2O(g)                       | -1.98  | -0.00  | 1.98   | H2O                                        |
| H2S(g)                       | -6.71  | -7.51  | -0.79  | H2S                                        |
| Halite                       | -6.13  | -4.59  | 1.54   | NaCl                                       |
| Halloysite                   | -2.64  | 11.62  | 14.27  | Al2Si2O5(OH)4                              |
| Hausmannite                  | -25.96 | 39.53  | 65.49  | Mn3O4                                      |
| Hematite                     | 5.23   | 2.59   | -2.64  | Fe2O3                                      |
| Huntite                      | -7.46  | -36.29 | -28.83 | CaMg3(CO3)4                                |
| Hydromagnesite               | -17.72 | -24.17 | -6.45  | Mg5(CO3)4(OH)2·4H2O                        |
| Illite                       | -0.11  | -42.80 | -42.69 | K0.6Mg0.25Al2.3Si3.5O10(OH)2               |
| Jarosite(ss)                 | -17.80 | -27.63 | -9.83  | (K0.77Na0.03H0.2)Fe3(SO4)2(OH)6            |
| Jarosite-K                   | -19.09 | -26.91 | -7.82  | KFe3(SO4)2(OH)6                            |
| Jarosite-Na                  | -21.69 | -25.36 | -3.68  | NaFe3(SO4)2(OH)6                           |
| JarositeH                    | -27.78 | -30.72 | -2.95  | (H3O)Fe3(SO4)2(OH)6                        |
| Jurbanite                    | -4.21  | -7.44  | -3.23  | AlOHSO4                                    |
| Kaolinite                    | 2.62   | 11.62  | 9.00   | Al2Si2O5(OH)4                              |
| Kmica                        | 5.91   | 21.25  | 15.33  | KAl3Si3O10(OH)2                            |
| Laumontite                   | -2.01  | -34.73 | -32.72 | CaAl2Si4O12·4H2O                           |
| Leonhardite                  | 4.29   | -69.45 | -73.75 | Ca2Al4Si8O24·7H2O                          |
| Mackinawite                  | 0.09   | -4.56  | -4.65  | FeS                                        |
| Magadiite                    | -8.71  | -23.01 | -14.30 | NaSi7O13(OH)3·3H2O                         |
| Maghemite                    | -3.79  | 2.59   | 6.39   | Fe2O3                                      |
| Magnesite                    | -1.16  | -8.91  | -7.76  | MgCO3                                      |
| Magnetite                    | 6.77   | 12.74  | 5.97   | Fe3O4                                      |
| Manganite                    | -10.63 | 14.71  | 25.34  | MnOOH                                      |
| Melanterite                  | -4.72  | -7.16  | -2.44  | FeSO4·7H2O                                 |
| Mirabilite                   | -4.63  | -6.59  | -1.96  | Na2SO4·10H2O                               |
| Mn2(SO4)3                    | -71.83 | -75.81 | -3.98  | Mn2(SO4)3                                  |
| MnCl2·4H2O                   | -11.72 | -9.78  | 1.94   | MnCl2·4H2O                                 |
| MnS(Green)                   | -8.65  | -4.60  | 4.06   | MnS                                        |
| MnSO4                        | -10.55 | -7.20  | 3.36   | MnSO4                                      |
| Montmorillonite-Aberdeen     | -0.50  | -30.19 | -29.69 | (HNaK)0.14Mg0.45Fe0.33Al1.47Si3.82O10(OH)2 |
| Montmorillonite-BelleFourche | 0.40   | -34.52 | -34.91 | (HNaK)0.09Mg0.29Fe0.24Al1.57Si3.93O10(OH)2 |
| Montmorillonite-Ca           | 0.31   | -47.30 | -47.61 | Ca0.165Al2.33Si3.67O10(OH)2                |
| Nahcolite                    | -3.82  | -4.53  | -0.71  | NaHCO3                                     |
| Natron                       | -7.68  | -9.69  | -2.01  | Na2CO3·10H2O                               |
| Nesquehonite                 | -3.55  | -8.91  | -5.36  | MgCO3·3H2O                                 |
| NH3(g)                       | -8.35  | -6.21  | 2.13   | NH3                                        |
| Nsutite                      | -23.25 | 19.31  | 42.56  | MnO2                                       |
| O2(g)                        | -70.91 | -73.65 | -2.75  | O2                                         |
| Phillipsite                  | -2.38  | -22.26 | -19.87 | Na0.5K0.5AlSi3O8·H2O                       |
| Phlogopite                   | -9.18  | 35.99  | 45.17  | KMg3AlSi3O10(OH)2                          |
| Portlandite                  | -13.32 | 10.86  | 24.17  | Ca(OH)2                                    |

|                      |        |        |        |                                                                                   |
|----------------------|--------|--------|--------|-----------------------------------------------------------------------------------|
| Prehnite             | -7.66  | -19.82 | -12.16 | Ca <sub>2</sub> Al <sub>2</sub> Si <sub>3</sub> O <sub>10</sub> (OH) <sub>2</sub> |
| Pyrite               | 8.91   | -10.07 | -18.98 | FeS <sub>2</sub>                                                                  |
| Pyrochroite          | -5.09  | 10.11  | 15.20  | Mn(OH) <sub>2</sub>                                                               |
| Pyrolusite           | -24.96 | 19.31  | 44.27  | MnO <sub>2</sub>                                                                  |
| Pyrophyllite         | 2.73   | -45.58 | -48.31 | Al <sub>2</sub> Si <sub>4</sub> O <sub>10</sub> (OH) <sub>2</sub>                 |
| Quartz               | 0.19   | -4.05  | -4.25  | SiO <sub>2</sub>                                                                  |
| Rhodochrosite        | 0.77   | -10.29 | -11.07 | MnCO <sub>3</sub>                                                                 |
| Rhodochrosite(d)     | 0.10   | -10.29 | -10.39 | MnCO <sub>3</sub>                                                                 |
| Sepiolite            | -5.41  | 10.82  | 16.23  | Mg <sub>2</sub> Si <sub>3</sub> O <sub>7</sub> .5OH:3H <sub>2</sub> O             |
| Sepiolite(d)         | -7.84  | 10.82  | 18.66  | Mg <sub>2</sub> Si <sub>3</sub> O <sub>7</sub> .5OH:3H <sub>2</sub> O             |
| Siderite             | 0.52   | -10.26 | -10.78 | FeCO <sub>3</sub>                                                                 |
| Siderite(d) (3)      | 0.19   | -10.26 | -10.45 | FeCO <sub>3</sub>                                                                 |
| Silicagel            | -0.84  | -4.05  | -3.21  | SiO <sub>2</sub>                                                                  |
| SiO <sub>2</sub> (a) | -1.19  | -4.05  | -2.86  | SiO <sub>2</sub>                                                                  |
| Sulfur               | -3.59  | -18.96 | -15.38 | S                                                                                 |
| Talc                 | -5.19  | 18.26  | 23.45  | Mg <sub>3</sub> Si <sub>4</sub> O <sub>10</sub> (OH) <sub>2</sub>                 |
| Thenardite           | -6.43  | -6.59  | -0.15  | Na <sub>2</sub> SO <sub>4</sub>                                                   |
| Thermonatrite        | -9.93  | -9.69  | 0.25   | Na <sub>2</sub> CO <sub>3</sub> :H <sub>2</sub> O                                 |
| Tremolite            | -14.12 | 46.75  | 60.87  | Ca <sub>2</sub> Mg <sub>5</sub> Si <sub>8</sub> O <sub>22</sub> (OH) <sub>2</sub> |
| Trona                | -14.22 | -14.22 | 0.00   | NaHCO <sub>3</sub> :Na <sub>2</sub> CO <sub>3</sub> :2H <sub>2</sub> O            |
| Wairakite            | -6.86  | -34.73 | -27.87 | CaAl <sub>2</sub> Si <sub>4</sub> O <sub>12</sub> :2H <sub>2</sub> O              |

\*\*For a gas, SI = log10(fugacity). Fugacity = pressure \* phi / 1 atm.  
For ideal gases, phi = 1.

-----  
End of simulation.  
-----

-----  
Reading input data for simulation 2.  
-----

```

EQUILIBRIUM PHASES 1
Calcite 0.0 CO2(g) 1      # Add CO2(g) until calcite saturation
    FIX_H+ -7.6 NaOH 10   # Add NaOH to pH 7.6
Halite -3.7 10           # Optimze conduct. to environmentally relevant
values.
Dolomite -1.87 0
PHASES
FIX_H+
    H+ = H+
        logK 0
END

```

-----  
End of simulation.  
-----

-----  
Reading input data for simulation 3.  
-----

```

TITLE pH is adjusted to measured monimolimic values
    conductance and pe OK, envirooneemntally relevant [C(4)] levels obtained by
iteration of dolomite SI: error significantly optimized
USE solution 1
USE equilibrium_phases 1
END

```

-----  
TITLE  
-----

```

pH is adjusted to measured monimolimic values
    conductance and pe OK, envirooneemntally relevant [C(4)] levels obtained by iteration of
dolomite SI: error significantly optimized

```

-----  
Beginning of batch-reaction calculations.

Reaction step 1.

WARNING: Calcite, Pure phase with add formula has not converged.  
SI may be a local minimum. Residual: 2.729569e+00

Using solution 1. LAKE MEDARD MONIMOLIMNION'S WATER (quite imbalanced)  
Using pure phase assemblage 1.

-----Phase assemblage-----

| Phase    | SI    | log IAP     | log K(T, P) | Moles in assemblage |           |            |
|----------|-------|-------------|-------------|---------------------|-----------|------------|
|          |       |             |             | Initial             | Final     | Delta      |
| Calcite  | -1.19 | -9.59       | -8.40       |                     |           |            |
| CO2      |       | is reactant |             | 1.000e+00           | 9.994e-01 | -6.017e-04 |
| Dolomite | -1.87 | -18.54      | -16.67      | 0.000e+00           | 0         | 0.000e+00  |
| FIX_H+   | -7.60 | -7.60       | 0.00        |                     |           |            |
| NaOH     |       | is reactant |             | 1.000e+01           | 9.999e+00 | -6.708e-04 |
| Halite   | -3.70 | -2.16       | 1.54        | 1.000e+01           | 9.895e+00 | -1.051e-01 |

-----Solution composition-----

| Elements | Molality  | Moles     |
|----------|-----------|-----------|
| Al       | 1.003e-07 | 1.003e-07 |
| C        | 7.123e-03 | 7.124e-03 |
| Ca       | 1.523e-04 | 1.523e-04 |
| Cl       | 1.105e-01 | 1.105e-01 |
| Fe       | 3.285e-05 | 3.285e-05 |
| K        | 2.052e-04 | 2.052e-04 |
| Mg       | 6.189e-04 | 6.189e-04 |
| Mn       | 3.248e-05 | 3.248e-05 |
| N        | 1.483e-04 | 1.483e-04 |
| Na       | 1.129e-01 | 1.129e-01 |
| S        | 1.644e-02 | 1.644e-02 |
| Si       | 8.798e-05 | 8.799e-05 |

-----Description of solution-----

|                                          |   |              |                               |
|------------------------------------------|---|--------------|-------------------------------|
| pH                                       | = | 7.600        | Charge balance                |
| pe                                       | = | -3.680       | Adjusted to redox equilibrium |
| Activity of water                        | = | 0.996        |                               |
| Ionic strength (mol/kgw)                 | = | 1.441e-01    |                               |
| Mass of water (kg)                       | = | 1.000e+00    |                               |
| Total alkalinity (eq/kg)                 | = | 6.799e-03    |                               |
| Total CO2 (mol/kg)                       | = | 7.123e-03    |                               |
| Temperature (°C)                         | = | 8.00         |                               |
| Electrical balance (eq)                  | = | -3.534e-02   |                               |
| Percent error, 100*(Cat- An )/(Cat+ An ) | = | -13.64       |                               |
| Iterations                               | = | 52           |                               |
| Total H                                  | = | 1.110201e+02 |                               |
| Total O                                  | = | 5.559343e+01 |                               |

-----Distribution of species-----

| Species  | Molality  | Activity  | Log      | Log      | Log    | mole V<br>cm <sup>3</sup> /mol |
|----------|-----------|-----------|----------|----------|--------|--------------------------------|
|          |           |           | Molality | Activity | Gamma  |                                |
| OH-      | 1.312e-07 | 9.690e-08 | -6.882   | -7.014   | -0.132 | (0)                            |
| H+       | 3.084e-08 | 2.512e-08 | -7.511   | -7.600   | -0.089 | 0.00                           |
| H2O      | 5.551e+01 | 9.958e-01 | 1.744    | -0.002   | 0.000  | 18.02                          |
| Al       | 1.003e-07 |           |          |          |        |                                |
| Al(OH)4- | 9.812e-08 | 7.425e-08 | -7.008   | -7.129   | -0.121 | (0)                            |
| Al(OH)3  | 1.108e-09 | 1.146e-09 | -8.955   | -8.941   | 0.014  | (0)                            |
| Al(OH)2+ | 1.039e-09 | 8.011e-10 | -8.983   | -9.096   | -0.113 | (0)                            |
| AlOH+2   | 3.784e-11 | 1.337e-11 | -10.422  | -10.874  | -0.452 | (0)                            |

|              |           |           |         |         |        |     |
|--------------|-----------|-----------|---------|---------|--------|-----|
| AlSO4+       | 1.665e-12 | 1.260e-12 | -11.779 | -11.900 | -0.121 | (0) |
| Al+3         | 6.788e-13 | 1.070e-13 | -12.168 | -12.971 | -0.803 | (0) |
| Al (SO4) 2-  | 2.279e-13 | 1.725e-13 | -12.642 | -12.763 | -0.121 | (0) |
| AlHSO4+2     | 7.263e-21 | 2.515e-21 | -20.139 | -20.599 | -0.461 | (0) |
| C (-4)       | 9.803e-09 |           |         |         |        |     |
| CH4          | 9.803e-09 | 1.013e-08 | -8.009  | -7.994  | 0.014  | (0) |
| C (4)        | 7.123e-03 |           |         |         |        |     |
| HCO3-        | 6.471e-03 | 4.989e-03 | -2.189  | -2.302  | -0.113 | (0) |
| CO2          | 3.706e-04 | 3.831e-04 | -3.431  | -3.417  | 0.014  | (0) |
| NaHCO3       | 2.296e-04 | 2.373e-04 | -3.639  | -3.625  | 0.014  | (0) |
| CO3-2        | 1.723e-05 | 6.086e-06 | -4.764  | -5.216  | -0.452 | (0) |
| MgHCO3+      | 1.368e-05 | 1.024e-05 | -4.864  | -4.990  | -0.126 | (0) |
| NaCO3-       | 5.010e-06 | 3.862e-06 | -5.300  | -5.413  | -0.113 | (0) |
| FeHCO3+      | 4.911e-06 | 3.767e-06 | -5.309  | -5.424  | -0.115 | (0) |
| MnHCO3+      | 3.950e-06 | 3.021e-06 | -5.403  | -5.520  | -0.116 | (0) |
| MnCO3        | 3.178e-06 | 3.285e-06 | -5.498  | -5.483  | 0.014  | (0) |
| CaHCO3+      | 2.373e-06 | 1.850e-06 | -5.625  | -5.733  | -0.108 | (0) |
| FeCO3        | 1.067e-06 | 1.103e-06 | -5.972  | -5.958  | 0.014  | (0) |
| MgCO3        | 7.926e-07 | 8.194e-07 | -6.101  | -6.087  | 0.014  | (0) |
| CaCO3        | 3.362e-07 | 3.475e-07 | -6.473  | -6.459  | 0.014  | (0) |
| Ca           | 1.523e-04 |           |         |         |        |     |
| Ca+2         | 1.171e-04 | 4.233e-05 | -3.931  | -4.373  | -0.442 | (0) |
| CaSO4        | 3.249e-05 | 3.359e-05 | -4.488  | -4.474  | 0.014  | (0) |
| CaHCO3+      | 2.373e-06 | 1.850e-06 | -5.625  | -5.733  | -0.108 | (0) |
| CaCO3        | 3.362e-07 | 3.475e-07 | -6.473  | -6.459  | 0.014  | (0) |
| CaOH+        | 3.573e-10 | 2.785e-10 | -9.447  | -9.555  | -0.108 | (0) |
| CaHSO4+      | 5.410e-12 | 4.150e-12 | -11.267 | -11.382 | -0.115 | (0) |
| Cl           | 1.105e-01 |           |         |         |        |     |
| Cl-          | 1.105e-01 | 8.202e-02 | -0.957  | -1.086  | -0.129 | (0) |
| MnCl+        | 2.968e-06 | 2.270e-06 | -5.527  | -5.644  | -0.116 | (0) |
| FeCl+        | 1.118e-06 | 8.550e-07 | -5.952  | -6.068  | -0.116 | (0) |
| MnCl2        | 7.863e-08 | 8.129e-08 | -7.104  | -7.090  | 0.014  | (0) |
| MnCl3-       | 2.401e-09 | 1.836e-09 | -8.620  | -8.736  | -0.116 | (0) |
| FeCl+2       | 2.294e-22 | 7.849e-23 | -21.639 | -22.105 | -0.466 | (0) |
| FeCl2+       | 6.638e-23 | 5.093e-23 | -22.178 | -22.293 | -0.115 | (0) |
| FeCl3        | 4.041e-25 | 4.177e-25 | -24.394 | -24.379 | 0.014  | (0) |
| Fe (2)       | 3.285e-05 |           |         |         |        |     |
| Fe+2         | 2.045e-05 | 7.552e-06 | -4.689  | -5.122  | -0.433 | (0) |
| FeHCO3+      | 4.911e-06 | 3.767e-06 | -5.309  | -5.424  | -0.115 | (0) |
| FeSO4        | 4.397e-06 | 4.545e-06 | -5.357  | -5.342  | 0.014  | (0) |
| FeCl+        | 1.118e-06 | 8.550e-07 | -5.952  | -6.068  | -0.116 | (0) |
| FeCO3        | 1.067e-06 | 1.103e-06 | -5.972  | -5.958  | 0.014  | (0) |
| Fe (HS) 2    | 8.698e-07 | 8.991e-07 | -6.061  | -6.046  | 0.014  | (0) |
| FeOH+        | 3.218e-08 | 2.461e-08 | -7.492  | -7.609  | -0.116 | (0) |
| Fe (HS) 3-   | 1.475e-09 | 1.132e-09 | -8.831  | -8.946  | -0.115 | (0) |
| Fe (OH) 2    | 1.675e-12 | 1.731e-12 | -11.776 | -11.762 | 0.014  | (0) |
| FeHSO4+      | 9.652e-13 | 7.404e-13 | -12.015 | -12.131 | -0.115 | (0) |
| Fe (OH) 3-   | 2.793e-15 | 2.136e-15 | -14.554 | -14.670 | -0.116 | (0) |
| Fe (3)       | 1.186e-13 |           |         |         |        |     |
| Fe (OH) 3    | 7.414e-14 | 7.664e-14 | -13.130 | -13.116 | 0.014  | (0) |
| Fe (OH) 2+   | 4.271e-14 | 3.293e-14 | -13.369 | -13.482 | -0.113 | (0) |
| Fe (OH) 4-   | 1.742e-15 | 1.343e-15 | -14.759 | -14.872 | -0.113 | (0) |
| FeOH+2       | 1.452e-17 | 4.969e-18 | -16.838 | -17.304 | -0.466 | (0) |
| FeSO4+       | 2.540e-21 | 1.943e-21 | -20.595 | -20.712 | -0.116 | (0) |
| Fe+3         | 3.561e-22 | 5.611e-23 | -21.448 | -22.251 | -0.803 | (0) |
| Fe (SO4) 2-  | 2.430e-22 | 1.864e-22 | -21.614 | -21.729 | -0.115 | (0) |
| FeCl+2       | 2.294e-22 | 7.849e-23 | -21.639 | -22.105 | -0.466 | (0) |
| FeCl2+       | 6.638e-23 | 5.093e-23 | -22.178 | -22.293 | -0.115 | (0) |
| FeCl3        | 4.041e-25 | 4.177e-25 | -24.394 | -24.379 | 0.014  | (0) |
| FeHSO4+2     | 3.990e-28 | 1.382e-28 | -27.399 | -27.860 | -0.461 | (0) |
| Fe2 (OH) 2+4 | 9.732e-32 | 1.400e-33 | -31.012 | -32.854 | -1.842 | (0) |
| Fe3 (OH) 4+5 | 0.000e+00 | 0.000e+00 | -40.416 | -43.294 | -2.878 | (0) |
| H (0)        | 2.369e-11 |           |         |         |        |     |
| H2           | 1.184e-11 | 1.224e-11 | -10.927 | -10.912 | 0.014  | (0) |
| K            | 2.052e-04 |           |         |         |        |     |
| K+           | 2.005e-04 | 1.489e-04 | -3.698  | -3.827  | -0.129 | (0) |
| KSO4-        | 4.662e-06 | 3.594e-06 | -5.331  | -5.444  | -0.113 | (0) |
| Mg           | 6.189e-04 |           |         |         |        |     |



|             |           |           |          |          |        |     |
|-------------|-----------|-----------|----------|----------|--------|-----|
| Mg+2        | 4.815e-04 | 1.832e-04 | -3.317   | -3.737   | -0.420 | (0) |
| MgSO4       | 1.229e-04 | 1.270e-04 | -3.911   | -3.896   | 0.014  | (0) |
| MgHCO3+     | 1.368e-05 | 1.024e-05 | -4.864   | -4.990   | -0.126 | (0) |
| MgCO3       | 7.926e-07 | 8.194e-07 | -6.101   | -6.087   | 0.014  | (0) |
| MgOH+       | 6.584e-09 | 5.176e-09 | -8.182   | -8.286   | -0.104 | (0) |
| Mn (2)      | 3.248e-05 |           |          |          |        |     |
| Mn+2        | 1.840e-05 | 6.794e-06 | -4.735   | -5.168   | -0.433 | (0) |
| MnHCO3+     | 3.950e-06 | 3.021e-06 | -5.403   | -5.520   | -0.116 | (0) |
| MnSO4       | 3.900e-06 | 4.031e-06 | -5.409   | -5.395   | 0.014  | (0) |
| MnCO3       | 3.178e-06 | 3.285e-06 | -5.498   | -5.483   | 0.014  | (0) |
| MnCl+       | 2.968e-06 | 2.270e-06 | -5.527   | -5.644   | -0.116 | (0) |
| MnCl2       | 7.863e-08 | 8.129e-08 | -7.104   | -7.090   | 0.014  | (0) |
| MnCl3-      | 2.401e-09 | 1.836e-09 | -8.620   | -8.736   | -0.116 | (0) |
| MnOH+       | 2.082e-09 | 1.593e-09 | -8.681   | -8.798   | -0.116 | (0) |
| Mn (OH) 3-  | 8.772e-18 | 6.709e-18 | -17.057  | -17.173  | -0.116 | (0) |
| Mn (NO3) 2  | 0.000e+00 | 0.000e+00 | -175.338 | -175.324 | 0.014  | (0) |
| Mn (3)      | 2.001e-35 |           |          |          |        |     |
| Mn+3        | 2.001e-35 | 3.153e-36 | -34.699  | -35.501  | -0.803 | (0) |
| Mn (6)      | 0.000e+00 |           |          |          |        |     |
| MnO4-2      | 0.000e+00 | 0.000e+00 | -83.718  | -84.184  | -0.466 | (0) |
| Mn (7)      | 0.000e+00 |           |          |          |        |     |
| MnO4-       | 0.000e+00 | 0.000e+00 | -98.289  | -98.427  | -0.137 | (0) |
| N (-3)      | 3.940e-05 |           |          |          |        |     |
| NH4+        | 3.712e-05 | 2.665e-05 | -4.430   | -4.574   | -0.144 | (0) |
| NH4SO4-     | 2.112e-06 | 1.616e-06 | -5.675   | -5.792   | -0.116 | (0) |
| NH3         | 1.632e-07 | 1.687e-07 | -6.787   | -6.773   | 0.014  | (0) |
| N (0)       | 1.090e-04 |           |          |          |        |     |
| N2          | 5.448e-05 | 5.631e-05 | -4.264   | -4.249   | 0.014  | (0) |
| N (3)       | 0.000e+00 |           |          |          |        |     |
| NO2-        | 0.000e+00 | 0.000e+00 | -62.600  | -62.716  | -0.115 | (0) |
| N (5)       | 0.000e+00 |           |          |          |        |     |
| NO3-        | 0.000e+00 | 0.000e+00 | -85.249  | -85.387  | -0.137 | (0) |
| Mn (NO3) 2  | 0.000e+00 | 0.000e+00 | -175.338 | -175.324 | 0.014  | (0) |
| Na          | 1.129e-01 |           |          |          |        |     |
| Na+         | 1.103e-01 | 8.460e-02 | -0.957   | -1.073   | -0.115 | (0) |
| NaSO4-      | 2.309e-03 | 1.780e-03 | -2.637   | -2.750   | -0.113 | (0) |
| NaHCO3      | 2.296e-04 | 2.373e-04 | -3.639   | -3.625   | 0.014  | (0) |
| NaCO3-      | 5.010e-06 | 3.862e-06 | -5.300   | -5.413   | -0.113 | (0) |
| O (0)       | 0.000e+00 |           |          |          |        |     |
| O2          | 0.000e+00 | 0.000e+00 | -76.392  | -76.377  | 0.014  | (0) |
| S (-2)      | 2.321e-05 |           |          |          |        |     |
| HS-         | 1.565e-05 | 1.156e-05 | -4.806   | -4.937   | -0.132 | (0) |
| H2S         | 4.462e-06 | 4.613e-06 | -5.350   | -5.336   | 0.014  | (0) |
| Fe (HS) 2   | 8.698e-07 | 8.991e-07 | -6.061   | -6.046   | 0.014  | (0) |
| S6-2        | 1.142e-07 | 6.052e-08 | -6.942   | -7.218   | -0.276 | (0) |
| S5-2        | 9.102e-08 | 4.526e-08 | -7.041   | -7.344   | -0.303 | (0) |
| S4-2        | 5.507e-08 | 2.535e-08 | -7.259   | -7.596   | -0.337 | (0) |
| Fe (HS) 3-  | 1.475e-09 | 1.132e-09 | -8.831   | -8.946   | -0.115 | (0) |
| S-2         | 4.724e-11 | 1.617e-11 | -10.326  | -10.791  | -0.466 | (0) |
| S3-2        | 1.990e-11 | 8.317e-12 | -10.701  | -11.080  | -0.379 | (0) |
| S2-2        | 1.115e-12 | 4.262e-13 | -11.953  | -12.370  | -0.418 | (0) |
| S (6)       | 1.642e-02 |           |          |          |        |     |
| SO4-2       | 1.394e-02 | 4.706e-03 | -1.856   | -2.327   | -0.471 | (0) |
| NaSO4-      | 2.309e-03 | 1.780e-03 | -2.637   | -2.750   | -0.113 | (0) |
| MgSO4       | 1.229e-04 | 1.270e-04 | -3.911   | -3.896   | 0.014  | (0) |
| CaSO4       | 3.249e-05 | 3.359e-05 | -4.488   | -4.474   | 0.014  | (0) |
| KSO4-       | 4.662e-06 | 3.594e-06 | -5.331   | -5.444   | -0.113 | (0) |
| FeSO4       | 4.397e-06 | 4.545e-06 | -5.357   | -5.342   | 0.014  | (0) |
| MnSO4       | 3.900e-06 | 4.031e-06 | -5.409   | -5.395   | 0.014  | (0) |
| NH4SO4-     | 2.112e-06 | 1.616e-06 | -5.675   | -5.792   | -0.116 | (0) |
| HSO4-       | 1.078e-08 | 8.155e-09 | -7.968   | -8.089   | -0.121 | (0) |
| CaHSO4+     | 5.410e-12 | 4.150e-12 | -11.267  | -11.382  | -0.115 | (0) |
| AlSO4+      | 1.665e-12 | 1.260e-12 | -11.779  | -11.900  | -0.121 | (0) |
| FeHSO4+     | 9.652e-13 | 7.404e-13 | -12.015  | -12.131  | -0.115 | (0) |
| Al (SO4) 2- | 2.279e-13 | 1.725e-13 | -12.642  | -12.763  | -0.121 | (0) |
| AlHSO4+2    | 7.263e-21 | 2.515e-21 | -20.139  | -20.599  | -0.461 | (0) |
| FeSO4+      | 2.540e-21 | 1.943e-21 | -20.595  | -20.712  | -0.116 | (0) |
| Fe (SO4) 2- | 2.430e-22 | 1.864e-22 | -21.614  | -21.729  | -0.115 | (0) |

|          |           |           |         |         |        |     |
|----------|-----------|-----------|---------|---------|--------|-----|
| FeHSO4+2 | 3.990e-28 | 1.382e-28 | -27.399 | -27.860 | -0.461 | (0) |
| Si       | 8.798e-05 |           |         |         |        |     |
| H4SiO4   | 8.762e-05 | 9.057e-05 | -4.057  | -4.043  | 0.014  | (0) |
| H3SiO4-  | 3.663e-07 | 2.740e-07 | -6.436  | -6.562  | -0.126 | (0) |
| H2SiO4-2 | 6.165e-13 | 2.178e-13 | -12.210 | -12.662 | -0.452 | (0) |

-----Saturation indices-----

| Phase            | SI**   | log IAP | log K(281 K, 1 atm) |                                       |
|------------------|--------|---------|---------------------|---------------------------------------|
| Adularia         | -1.13  | -23.07  | -21.94              | KAlSi3O8                              |
| Al (OH) 3 (a)    | -2.15  | 9.82    | 11.97               | Al (OH) 3                             |
| Albite           | -1.17  | -20.32  | -19.15              | NaAlSi3O8                             |
| AlumK            | -15.98 | -21.47  | -5.49               | KAl (SO4) 2:12H2O                     |
| Alunite          | -2.63  | -1.81   | 0.83                | KAl3 (SO4) 2 (OH) 6                   |
| Analcime         | -2.77  | -16.28  | -13.51              | NaAlSi2O6:H2O                         |
| Anhydrite        | -2.36  | -6.70   | -4.34               | CaSO4                                 |
| Annite           | 7.90   | -80.52  | -88.41              | KFe3AlSi3O10 (OH) 2                   |
| Anorthite        | -6.48  | -26.70  | -20.23              | CaAl2Si2O8                            |
| Aragonite        | -1.34  | -9.59   | -8.25               | CaCO3                                 |
| Artinite         | -8.37  | 2.50    | 10.87               | MgCO3:Mg (OH) 2:3H2O                  |
| Basaluminite     | -0.93  | 21.77   | 22.70               | Al4 (OH) 10SO4                        |
| Beidellite       | 0.58   | -47.37  | -47.95              | (NaKMg0.5) 0.11Al2.33Si3.67O10 (OH) 2 |
| Birnessite       | -25.73 | 17.87   | 43.60               | MnO2                                  |
| Bixbyite         | -25.47 | -25.41  | 0.06                | Mn2O3                                 |
| Boehmite         | -0.01  | 9.83    | 9.83                | AlOOH                                 |
| Brucite          | -6.58  | 11.46   | 18.04               | Mg (OH) 2                             |
| Calcite          | -1.19  | -9.59   | -8.40               | CaCO3                                 |
| CH4 (g)          | -5.28  | -7.99   | -2.71               | CH4                                   |
| Chalcedony       | -0.28  | -4.04   | -3.76               | SiO2                                  |
| Chloritel4A      | -10.26 | 64.83   | 75.09               | Mg5Al2Si3O10 (OH) 8                   |
| Chlorite7A       | -13.80 | 64.83   | 78.63               | Mg5Al2Si3O10 (OH) 8                   |
| Chrysotile       | -8.13  | 26.30   | 34.43               | Mg3Si2O5 (OH) 4                       |
| Clinoenstatite   | -4.81  | 7.42    | 12.23               | MgSiO3                                |
| CO2 (g)          | -2.18  | -3.42   | -1.24               | CO2                                   |
| Cristobalite     | -0.21  | -4.04   | -3.83               | SiO2                                  |
| Diaspore         | 1.85   | 9.83    | 7.97                | AlOOH                                 |
| Diopside         | -7.12  | 14.21   | 21.33               | CaMgSi2O6                             |
| Dolomite         | -1.87  | -18.54  | -16.67              | CaMg (CO3) 2                          |
| Dolomite (d)     | -2.49  | -18.54  | -16.05              | CaMg (CO3) 2                          |
| Epsomite         | -3.81  | -6.08   | -2.26               | MgSO4:7H2O                            |
| Fe (OH) 2.7Cl1.3 | 0.98   | -2.06   | -3.04               | Fe (OH) 2.7Cl10.3                     |
| Fe (OH) 3 (a)    | -4.35  | 0.54    | 4.89                | Fe (OH) 3                             |
| Fe3 (OH) 8       | -9.06  | 11.16   | 20.22               | Fe3 (OH) 8                            |
| FeS (ppt)        | 1.46   | -2.46   | -3.92               | FeS                                   |
| FIX_H+           | -7.60  | -7.60   | 0.00                | H+                                    |
| Forsterite       | -11.58 | 18.88   | 30.46               | Mg2SiO4                               |
| Gibbsite         | 0.70   | 9.82    | 9.12                | Al (OH) 3                             |
| Goethite         | 0.90   | 0.55    | -0.36               | FeOOH                                 |
| Greenalite       | 1.34   | 22.15   | 20.81               | Fe3Si2O5 (OH) 4                       |
| Greigite         | 6.06   | -38.97  | -45.03              | Fe3S4                                 |
| Gypsum           | -2.11  | -6.70   | -4.60               | CaSO4:2H2O                            |
| H2 (g)           | -7.84  | -10.91  | -3.07               | H2                                    |
| H2O (g)          | -1.98  | -0.00   | 1.98                | H2O                                   |
| H2S (g)          | -4.54  | -5.34   | -0.79               | H2S                                   |
| Halite           | -3.70  | -2.16   | 1.54                | NaCl                                  |
| Halloysite       | -2.70  | 11.57   | 14.27               | Al2Si2O5 (OH) 4                       |
| Hausmannite      | -27.56 | 37.93   | 65.49               | Mn3O4                                 |
| Hematite         | 3.73   | 1.09    | -2.64               | Fe2O3                                 |
| Huntite          | -7.62  | -36.45  | -28.83              | CaMg3 (CO3) 4                         |
| Hydromagnesite   | -17.91 | -24.36  | -6.45               | Mg5 (CO3) 4 (OH) 2:4H2O               |
| Illite           | -0.19  | -42.88  | -42.69              | K0.6Mg0.25Al2.3Si3.5O10 (OH) 2        |
| Jarosite (ss)    | -20.49 | -30.32  | -9.83               | (K0.77Na0.03H0.2) Fe3 (SO4) 2 (OH) 6  |
| Jarosite-K       | -21.82 | -29.65  | -7.82               | KFe3 (SO4) 2 (OH) 6                   |
| Jarosite-Na      | -23.21 | -26.89  | -3.68               | NaFe3 (SO4) 2 (OH) 6                  |
| JarositeH        | -30.47 | -33.42  | -2.95               | (H3O) Fe3 (SO4) 2 (OH) 6              |
| Jurbanite        | -4.47  | -7.70   | -3.23               | AlOHSO4                               |
| Kaolinite        | 2.57   | 11.57   | 9.00                | Al2Si2O5 (OH) 4                       |

|                              |        |        |        |                                            |
|------------------------------|--------|--------|--------|--------------------------------------------|
| Kmica                        | 5.80   | 21.13  | 15.33  | KAl3Si3O10(OH)2                            |
| Laumontite                   | -2.07  | -34.79 | -32.72 | CaAl2Si4O12:4H2O                           |
| Leonhardite                  | 4.17   | -69.58 | -73.75 | Ca2Al4Si8O24:7H2O                          |
| Mackinawite                  | 2.19   | -2.46  | -4.65  | FeS                                        |
| Magadiite                    | -7.46  | -21.76 | -14.30 | NaSi7O13(OH)3:3H2O                         |
| Maghemite                    | -5.29  | 1.09   | 6.39   | Fe2O3                                      |
| Magnesite                    | -1.20  | -8.95  | -7.76  | MgCO3                                      |
| Magnetite                    | 5.20   | 11.17  | 5.97   | Fe3O4                                      |
| Manganite                    | -11.39 | 13.95  | 25.34  | MnOOH                                      |
| Melanterite                  | -5.02  | -7.46  | -2.44  | FeSO4:7H2O                                 |
| Mirabilite                   | -2.54  | -4.49  | -1.96  | Na2SO4:10H2O                               |
| Mn2(SO4)3                    | -74.00 | -77.98 | -3.98  | Mn2(SO4)3                                  |
| MnCl2:4H2O                   | -9.29  | -7.35  | 1.94   | MnCl2:4H2O                                 |
| MnS(Green)                   | -6.56  | -2.50  | 4.06   | MnS                                        |
| MnSO4                        | -10.85 | -7.50  | 3.36   | MnSO4                                      |
| Montmorillonite-Aberdeen     | -0.61  | -30.30 | -29.69 | (HNaK)0.14Mg0.45Fe0.33Al1.47Si3.82O10(OH)2 |
| Montmorillonite-BelleFourche | 0.30   | -34.61 | -34.91 | (HNaK)0.09Mg0.29Fe0.24Al1.57Si3.93O10(OH)2 |
| Montmorillonite-Ca           | 0.27   | -47.35 | -47.61 | Ca0.165Al2.33Si3.67O10(OH)2                |
| N2(g)                        | -1.05  | -4.25  | -3.20  | N2                                         |
| Nahcolite                    | -2.66  | -3.37  | -0.71  | NaHCO3                                     |
| Natron                       | -5.37  | -7.38  | -2.01  | Na2CO3:10H2O                               |
| Nesquehonite                 | -3.59  | -8.96  | -5.36  | MgCO3:3H2O                                 |
| NH3(g)                       | -8.90  | -6.77  | 2.13   | NH3                                        |
| Nsutite                      | -24.70 | 17.87  | 42.56  | MnO2                                       |
| O2(g)                        | -73.63 | -76.38 | -2.75  | O2                                         |
| Phillipsite                  | -1.82  | -21.70 | -19.87 | Na0.5K0.5AlSi3O8:H2O                       |
| Phlogopite                   | -9.31  | 35.86  | 45.17  | KMg3AlSi3O10(OH)2                          |
| Portlandite                  | -13.35 | 10.82  | 24.17  | Ca(OH)2                                    |
| Prehnite                     | -7.76  | -19.92 | -12.16 | Ca2Al2Si3O10(OH)2                          |
| Pyrite                       | 11.82  | -7.16  | -18.98 | FeS2                                       |
| Pyrochroite                  | -5.17  | 10.03  | 15.20  | Mn(OH)2                                    |
| Pyrolusite                   | -26.40 | 17.87  | 44.27  | MnO2                                       |
| Pyrophyllite                 | 2.71   | -45.61 | -48.31 | Al2Si4O10(OH)2                             |
| Quartz                       | 0.21   | -4.04  | -4.25  | SiO2                                       |
| Rhodochrosite                | 0.68   | -10.38 | -11.07 | MnCO3                                      |
| Rhodochrosite(d)             | 0.01   | -10.38 | -10.39 | MnCO3                                      |
| Sepiolite                    | -5.44  | 10.80  | 16.23  | Mg2Si3O7.5OH:3H2O                          |
| Sepiolite(d)                 | -7.86  | 10.80  | 18.66  | Mg2Si3O7.5OH:3H2O                          |
| Siderite                     | 0.44   | -10.34 | -10.78 | FeCO3                                      |
| Siderite(d)(3)               | 0.11   | -10.34 | -10.45 | FeCO3                                      |
| Silicagel                    | -0.82  | -4.04  | -3.21  | SiO2                                       |
| SiO2(a)                      | -1.18  | -4.04  | -2.86  | SiO2                                       |
| Sulfur                       | -2.78  | -18.15 | -15.38 | S                                          |
| Talc                         | -5.23  | 18.22  | 23.45  | Mg3Si4O10(OH)2                             |
| Thenardite                   | -4.32  | -4.47  | -0.15  | Na2SO4                                     |
| Thermonatrite                | -7.61  | -7.36  | 0.25   | Na2CO3:H2O                                 |
| Tremolite                    | -14.23 | 46.64  | 60.87  | Ca2Mg5Si8O22(OH)2                          |
| Trona                        | -10.74 | -10.74 | 0.00   | NaHCO3:Na2CO3:2H2O                         |
| Wairakite                    | -6.92  | -34.79 | -27.87 | CaAl2Si4O12:2H2O                           |

\*\*For a gas, SI = log10(fugacity). Fugacity = pressure \* phi / 1 atm.  
For ideal gases, phi = 1.

-----  
End of simulation.  
-----

-----  
Reading input data for simulation 4.  
-----

-----  
End of Run after 0.104 Seconds.  
-----
