# Supplementary material for: Aqueous system-level processes and prokaryote assemblages in the ferruginous and sulfate-rich bottom waters of a post-mining lake
Source: Copernicus journal article supplement (doi:10.5194/bg-19-1723-2022), 2022-03-24
Supplement: Supplementary file 3 [file bg-19-1723-2022-supplement.zip]

SOLUTION\_MASTER\_SPECIES  
 N(-3) NH4+ 0.0 N  
 SOLUTION\_SPECIES  
 NH4+ = NH3 + H+  
       log\_k -9.252  
       delta\_h 12.48 kcal  
       -analytic 0.6322 -0.001225 -2835.76

NO3- + 10 H+ + 8 e- = NH4+ + 3 H2O  
       log\_k 119.077  
       delta\_h -187.055 kcal  
       -gamma 2.5000 0.0000

SOLUTION 1 LAKE MEDARD MONIMOLIMNION'S WATER (quite imbalanced)

|         |        |                           |
|---------|--------|---------------------------|
| units   | ppm    | # unless otherwise stated |
| pH      | 7.6    |                           |
| density | 1.002  |                           |
| temp    | 8.0    |                           |
| pe      | -3     |                           |
| Ca      | 6.09   |                           |
| Mg      | 15.01  |                           |
| Na      | 163591 | ppb                       |
| K       | 8004   | ppb                       |
| Al      | 0.0027 |                           |
| Mn      | 1.78   | pe                        |
| Si      | 5274   | ppb                       |
| Cl      | 192073 | ppb                       |
| S(6)    | 1575.4 |                           |
| S(-2)   | 4.263  | ppb # L.Q. AVS            |
| N(5)    | 1.116  | ppm as NO3                |
| N(-3)   | 2.345  | ppm as NH4                |
| Fe      | 1.83   | pe                        |
| C(4)    | 397    |                           |

END

EQUILIBRIUM\_PHASES 1

|          |       |        |    |                                                        |
|----------|-------|--------|----|--------------------------------------------------------|
| Calcite  | 0.0   | CO2(g) | 1  | # Add CO2(g) until calcite saturation                  |
| FIX_H+   | -7.6  | NaOH   | 10 | # Add NaOH to pH 7.6                                   |
| Halite   | -3.7  | 10     |    | # Optimze conduct. to environmentally relevant values. |
| Dolomite | -1.87 | 0      |    |                                                        |

PHASES  
 # Auxiliar phase used to fix pH  
 FIX\_H+  
   H+ = H+  
   logK 0

END  
 TITLE pH is adjusted to measured monimolimic values; conductance and pe OK,  
 environemntally relevant [C(4)] levels obtained by iteration of dolomite SI: error  
 significantly optimized  
 USE solution 1  
 USE equilibrium\_phases 1  
 END
